# Supplementary material for: A single-peak-structured solar cycle signal in stratospheric ozone based on Microwave Limb Sounder observations and model simulations
Source: Copernicus journal article supplement (doi:10.5194/acp-22-903-2022), 2022-01-19
Supplement: Supplementary file 1 [file acp-22-903-2022-supplement.pdf]

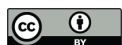

*Supplement of*

## **A single-peak-structured solar cycle signal in stratospheric ozone based on Microwave Limb Sounder observations and model simulations**

**Sandip S. Dhomse et al.**

*Correspondence to:* Sandip S. Dhomse (s.s.dhomse@leeds.ac.uk)

The copyright of individual parts of the supplement might differ from the article licence.

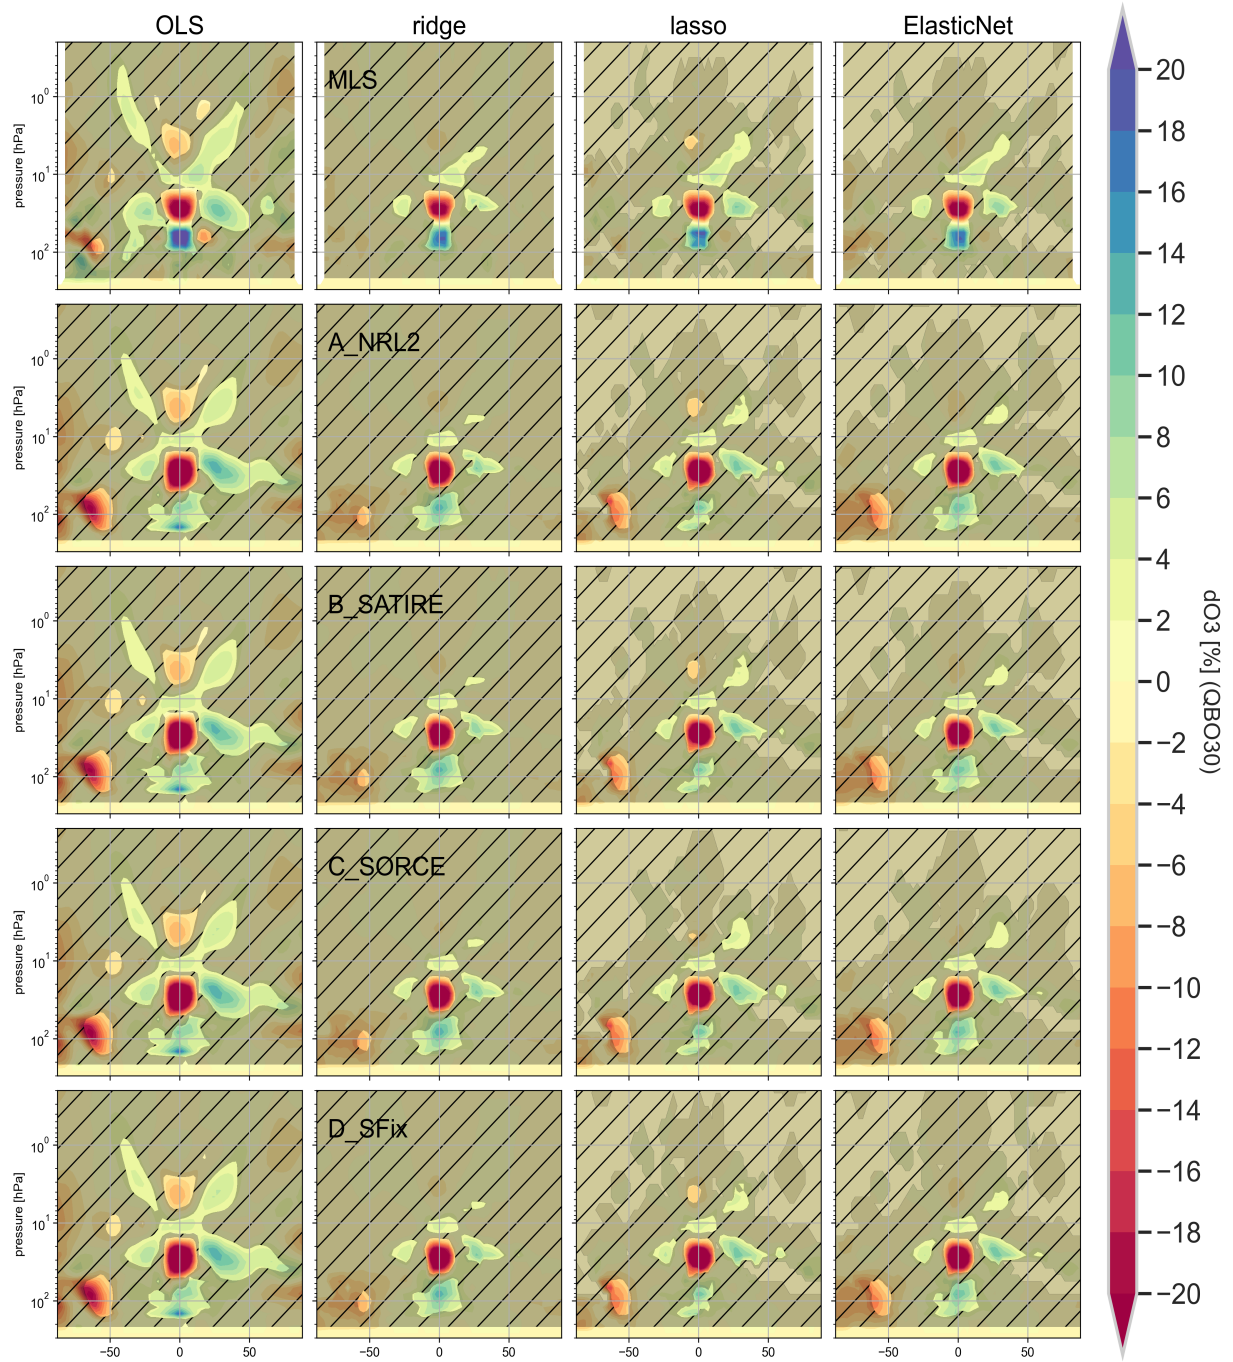

**Figure S1.** Latitude-pressure cross sections of QBO30 regression coefficients for MLS (top row) as well as model simulation **A\_NRL** (second row), **B\_SAT** (third row), **C\_SOR** (fourth row) and **D\_SFfix** (bottom row). Regression coefficients are from OLS (first column), Lasso (second column), Ridge (third column) and Elastic Net (fourth column) regression models. Stippling indicates regions where regression coefficients are smaller than 1- $\sigma$  uncertainty.

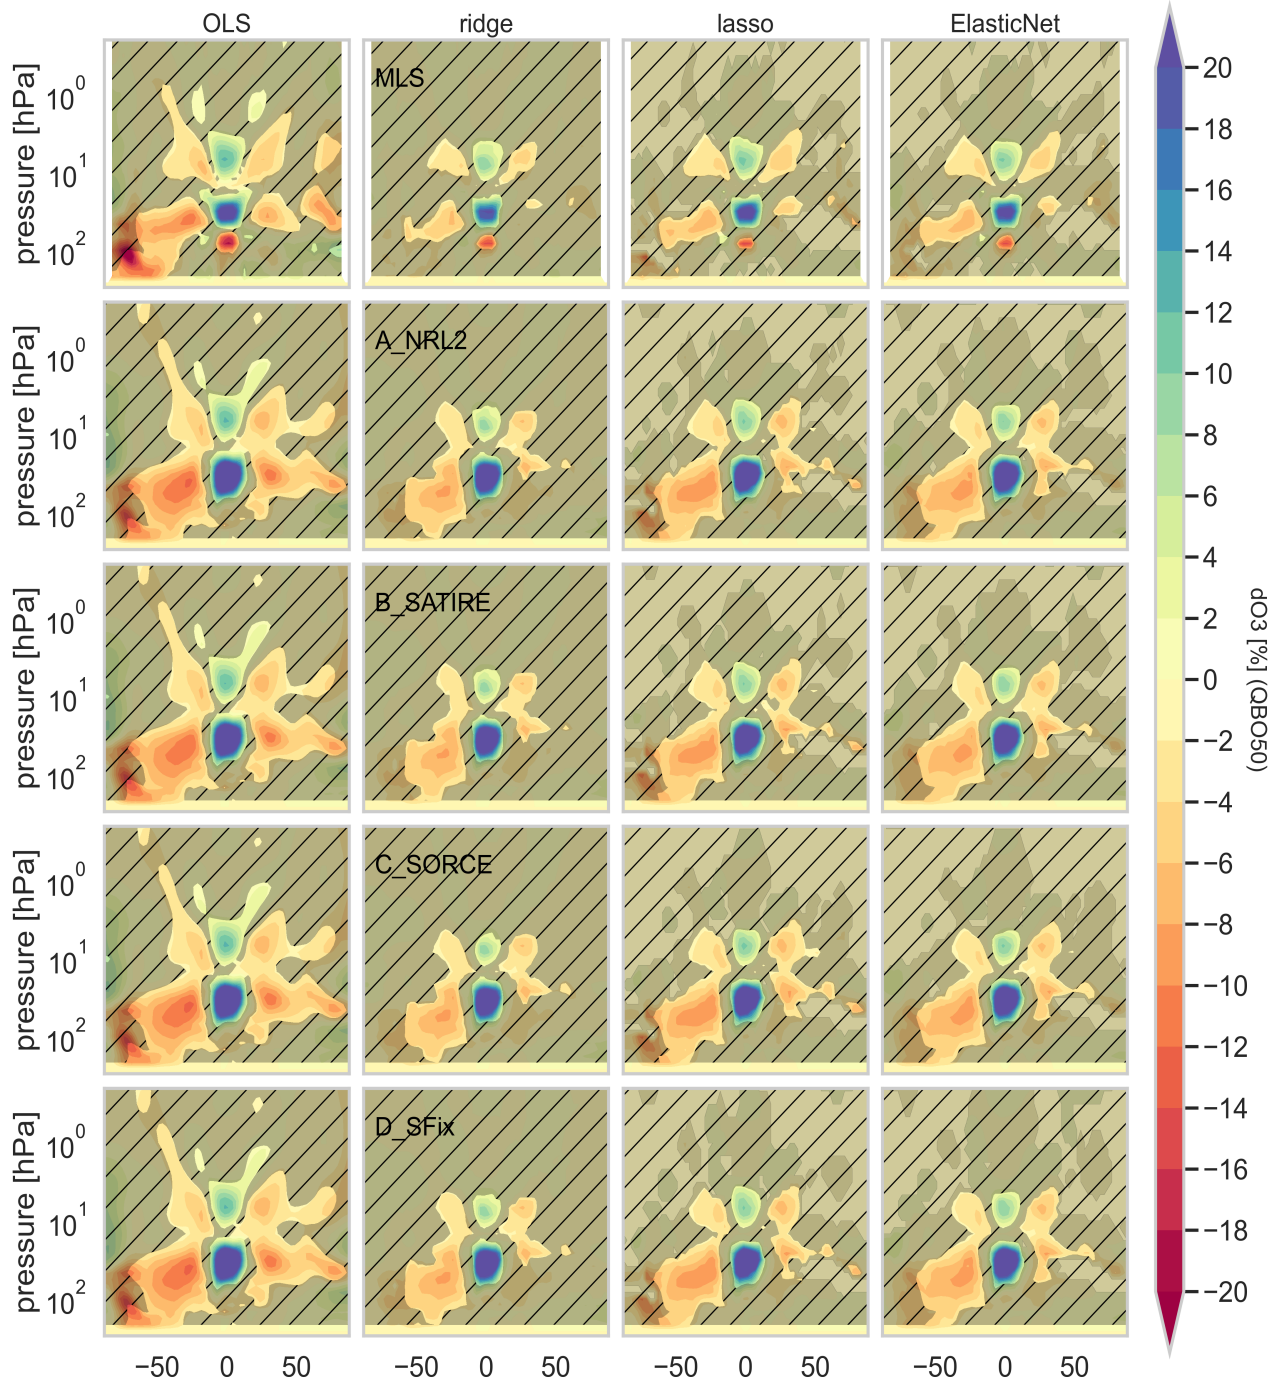

**Figure S2.** Same as Figure S1, but for QBO at 50 hPa.

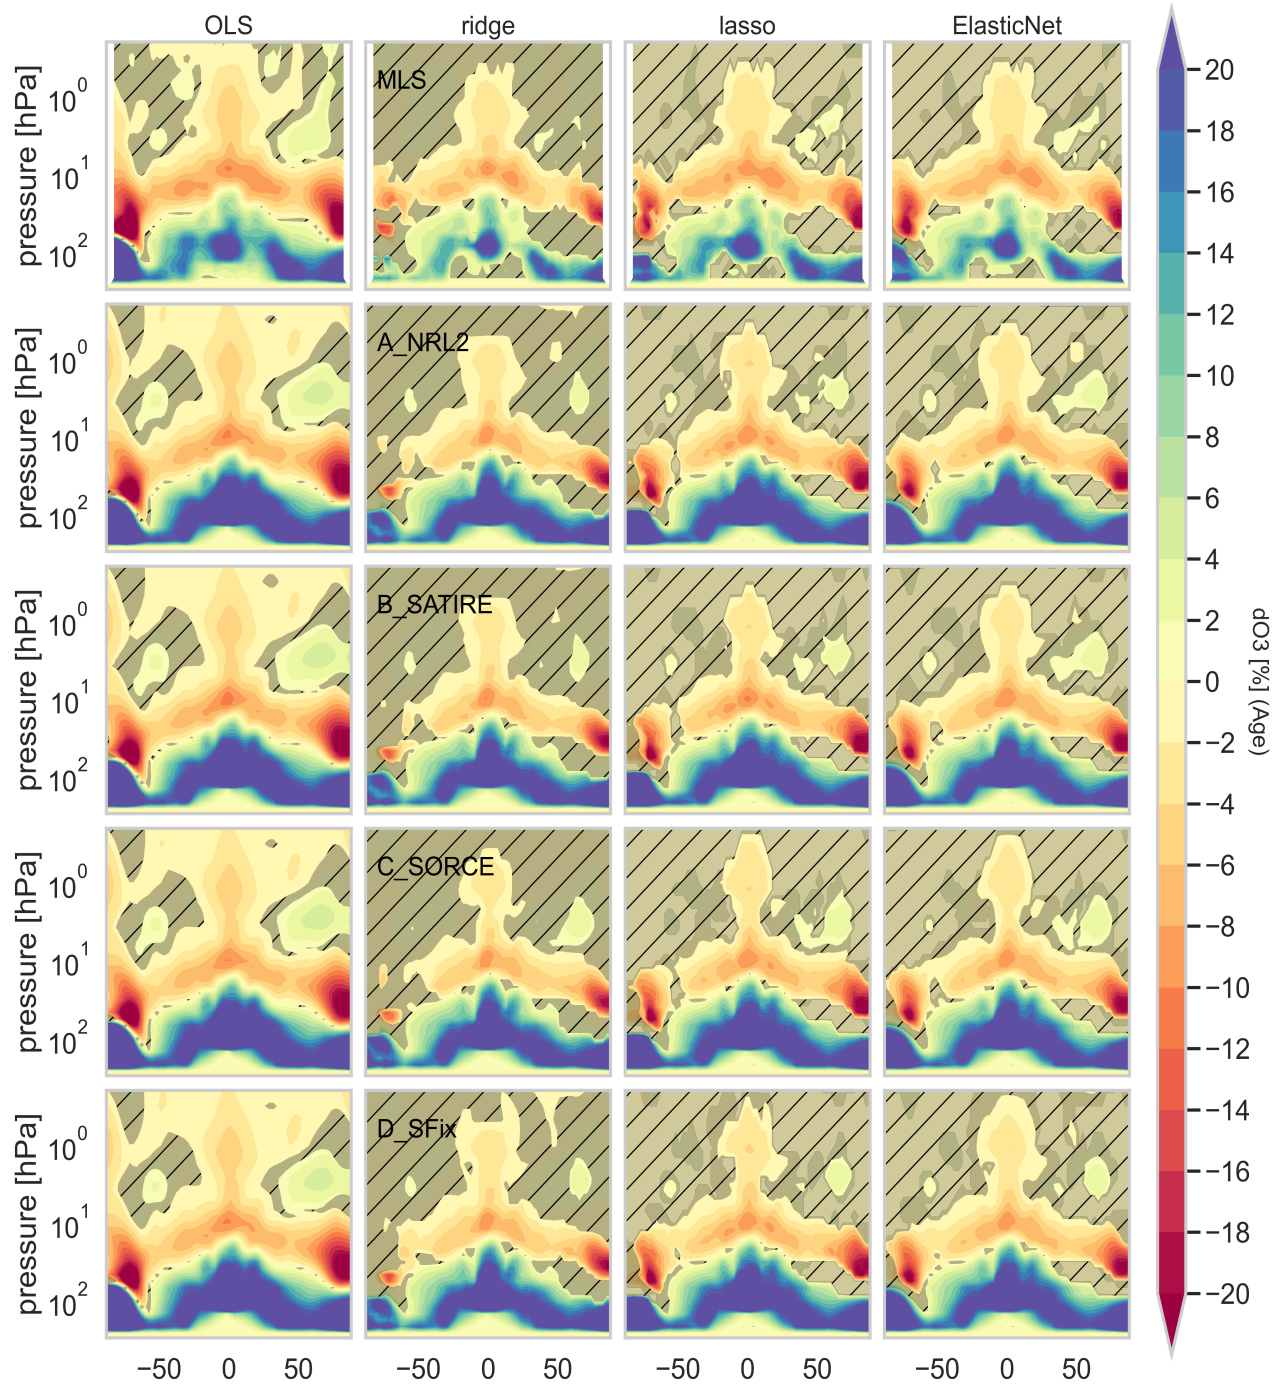

**Figure S3.** Same as Figure S1, but for age-of-air.
